# Supplementary material
Source: MDPI journal article supplement (https://www.mdpi.com/2072-4292/12/10/1578)
Supplement: s1 [file s1]

**Table S1. Summary of the basic measurements from all stations.**

| Station<br>unit | Date<br>ddmmyyyy | Position         |                   | Water composition |             |                       | Conditions          |                     |                    | Satlantic Spectrometer            |                |                |                | Eye on Water           |                   |                   | HydroColor |          |          |                |                            |
|-----------------|------------------|------------------|-------------------|-------------------|-------------|-----------------------|---------------------|---------------------|--------------------|-----------------------------------|----------------|----------------|----------------|------------------------|-------------------|-------------------|------------|----------|----------|----------------|----------------------------|
|                 |                  | Lat S<br>degrees | Long E<br>degrees | CHL<br>mg/m3      | SPM<br>g/m3 | CDOM<br>m-1 at 440 nm | Bottom<br>Depth (m) | Secchi<br>Depth (m) | Cloud<br>Cover (%) | Satlantic<br>hue angle<br>degrees | Satlantic<br>X | Satlantic<br>Y | Satlantic<br>Z | EOW<br>FUI<br>observer | EOW<br>FUI<br>old | EOW<br>FUI<br>new | HC<br>X    | HC<br>Y  | HC<br>Z  | HC SPM<br>g/m3 | HC<br>hue angle<br>degrees |
| Atkinson        | 16/2/16          | 27.423           | 152.440           | 85.0              | 44.0        | 1.6                   | 1.06                | 0.27                | 5                  | 45.26                             | 0.0180         | 0.0180         | 0.0049         | 17                     | 16                | 16                | 0.0227     | 0.0187   | 0.0090   | 22.3           |                            |
| Baroon          | 24/3/16          | 26.709           | 152.870           | 12.0              | 4.8         | 0.6                   | 14.1                | 1.34                | 85                 | 65.86                             | 0.0121         | 0.0137         | 0.0064         | 10                     | 11                | 11                | 0.0083     | 0.0093   | 0.0047   | 5.0            |                            |
| Borumba         | 24/3/16          | 26.513           | 152.579           | 24.1              | 5.7         | 1.2                   | 7.9                 | 1.05                | 95                 | 57.12                             | 0.0048         | 0.0052         | 0.0021         | 15                     | 14                | 14                | 0.0053     | 0.0055   | 0.0013   | 3.0            |                            |
| BrisbaneRiver01 | 8/3/16           | 27.488           | 152.996           | 4.6               | 158.0       | 0.6                   | 5.1                 | 0.17                | 5                  |                                   |                |                |                | 18                     | 18                | 17                |            |          |          |                |                            |
| BrisbaneRiver02 | 13/5/16          | 27.488           | 152.994           |                   |             |                       | 5.0                 | 0.49                | <5                 | 45.76                             | 0.0131         | 0.0131         | 0.0067         | 16                     | 16                | 16                | 0.0303     | 0.0233   | 0.0147   | 41.7           |                            |
| Clarendon       | 16/2/16          | 27.512           | 152.335           | 19.6              | 6.4         | 1.4                   | 4.65                | 1.1                 | 5                  | 57.63                             | 0.0076         | 0.0084         | 0.0030         | 13                     | 11                | 11                | 0.0093     | 0.0107   | 0.0030   | 6.0            |                            |
| Dyer            | 16/2/16          | 27.629           | 152.375           | 177.2             | 22.8        | 1.4                   | 4.65                | 1.1                 | 40                 | 50.98                             | 0.0168         | 0.0176         | 0.0055         | 16                     | 14                | 14                | 0.0113     | 0.0107   | 0.0033   | 7.7            |                            |
| Einbunpin       | 8/3/16           | 27.520           | 153.069           | 121.4             | 43.0        | 2.3                   | 0.35                | 0.35                | 30                 | 55.88                             | 0.0199         | 0.0218         | 0.0059         | 13                     | 13                | 12                | 0.0115     | 0.0113   | 0.0053   | 9.0            |                            |
| Ewen Maddock    | 24/3/16          | 26.775           | 153.000           | 13.6              | 3.1         | 1.3                   | 8.7                 | 1.7                 | 40-85              | 50.91                             | 0.0088         | 0.0091         | 0.0044         | 17                     | 15                | 15                | 0.0040     | 0.0037   | 0.0018   | 3.7            |                            |
| Liddell01       | 2/3/16           | 32.351           | 150.992           | 26.7              | 5.2         | 0.5                   | 4.7                 | 1                   | 30                 | 66.90                             | 0.0077         | 0.0088         | 0.0041         | 11                     | 11                | 11                | 0.0227     | 0.0283   | 0.0143   | 22.3           |                            |
| Liddell02       | 2/3/16           | 32.364           | 150.986           | 25.0              | 4.9         | 0.4                   | 12.7                | 1.1                 | 5~10               | 65.77                             | 0.0080         | 0.0091         | 0.0045         | 11                     | 11                | 11                | 0.0197     | 0.0235   | 0.0117   | 17.7           |                            |
| Liddell03       | 2/3/16           | 32.379           | 150.985           | 21.8              | 4.9         | 0.3                   | 6.7                 | 1.2                 | 10                 | 67.52                             | 0.0075         | 0.0084         | 0.0045         | 11                     | 10                | 11                | 0.0190     | 0.0237   | 0.0123   | 16.7           |                            |
| Liddell04       | 2/3/16           | 32.382           | 150.994           | 18.9              | 3.9         | 0.3                   | 30                  | 1.3                 | 75                 | 69.84                             | 0.0095         | 0.0109         | 0.0056         | 10                     | 10                | 10                | 0.0250     | 0.0320   | 0.0203   | 27.3           |                            |
| Liddell05       | 2/3/16           | 32.378           | 151.003           | 19.2              | 5.7         | 0.3                   | 24.8                | 1.25                | 75                 | 68.17                             | 0.0131         | 0.0151         | 0.0071         | 11                     | 11                | 11                | 0.0237     | 0.0310   | 0.0167   | 27.7           |                            |
| Liddell06       | 2/3/16           | 32.361           | 151.003           | 23.2              | 6.3         | 0.4                   | 8                   | 1.25                | 75-80              | 65.68                             | 0.0088         | 0.0099         | 0.0049         | 10                     | 11                | 11                | 0.0203     | 0.0247   | 0.0143   | 19.3           |                            |
| Lostock01       | 1/3/16           | 32.332           | 151.457           | 11.3              | 2.4         | 1.2                   | 14.9                | 1.5                 | 15-20              | 56.17                             | 0.0077         | 0.0082         | 0.0038         | 17                     | 15                | 16                | 0.0040     | 0.0040   | 0.0017   | 0.7            |                            |
| Lostock02       | 1/3/16           | 32.332           | 151.451           | 12.0              | 3.3         | 1.1                   | 16.3                | 1.6                 | 25-30              | 56.21                             | 0.0077         | 0.0083         | 0.0037         | 16                     | 14                | 14                | 0.0040     | 0.0043   | 0.0020   | 1.0            |                            |
| Lostock03       | 1/3/16           | 32.329           | 151.439           | 22.0              | 3.9         | 1.0                   | 5.4                 | 1.5                 | 30                 | 56.87                             | 0.0080         | 0.0087         | 0.0038         | 16                     | 14                | 15                | 0.0067     | 0.0073   | 0.0033   | 1.0            |                            |
| Lostock04       | 1/3/16           | 32.333           | 151.433           | 17.3              | 5.1         | 1.1                   | 13.5                | 1.5                 | 25                 | 55.21                             | 0.0091         | 0.0097         | 0.0041         | 15                     | 15                | 15                | 0.0130     | 0.0130   | 0.0077   | 1.0            |                            |
| Lostock05       | 1/3/16           | 32.339           | 151.438           | 14.0              | 4.1         | 1.3                   | 11                  | 1.25                | 25                 | 54.37                             | 0.0046         | 0.0049         | 0.0021         | 16                     | 15                | 15                | 0.0053     | 0.0053   | 0.0027   | 1.3            |                            |
| Lostock06       | 1/3/16           | 32.335           | 151.442           | 12.1              | 4.1         | 1.2                   | 14.3                | 1.6                 | 25                 | 55.81                             | 0.0082         | 0.0087         | 0.0039         | 16                     | 15                | 15                | 0.0043     | 0.0043   | 0.0020   | 1.7            |                            |
| Lostock07       | 1/3/16           | 32.337           | 151.451           | 10.8              | 3.1         | 1.2                   | 20                  | 2                   | 20                 | 55.60                             | 0.0080         | 0.0086         | 0.0040         | 16                     | 15                | 15                | 0.0047     | 0.0050   | 0.0027   | 1.3            |                            |
| Somerset        | 22/3/16          | 27.102           | 152.568           | 10.5              | 2.9         | 0.5                   | 1.3                 | 1.9                 | 95                 | 64.29                             | 0.0049         | 0.0056         | 0.0023         | 12                     | 13                | 13                | 0.0100     | 0.0113   | 0.0073   | 8.0            |                            |
| StClair01       | 3/3/16           | 32.356           | 151.272           | 2.3               | 1.2         | 0.5                   | 25.6                | 5.1                 | <5                 | 88.97                             | 0.0097         | 0.0121         | 0.0073         | 11                     | 9                 | 9                 | 0.0010     | 0.0027   | 0.0007   | 2.3            |                            |
| StClair02       | 3/3/16           | 32.363           | 151.277           | 2.6               | 1.2         | 0.6                   | 22                  | 5                   | <5                 | 88.81                             | 0.0098         | 0.0122         | 0.0072         | 9                      | 9                 | 9                 | 0.0017     | 0.0030   | 0.0017   | 2.3            |                            |
| StClair03       | 3/3/16           | 32.360           | 151.283           | 1.8               | 1.4         | 0.4                   | 19.7                | 5                   | <5                 | 89.13                             | 0.0099         | 0.0124         | 0.0073         | 10                     | 10                | 10                | 0.0018     | 0.0038   | 0.0025   | 4.0            |                            |
| StClair04       | 3/3/16           | 32.345           | 151.289           | 1.6               | 0.9         | 0.4                   | 10                  | 4.75                | <5                 |                                   |                |                |                | 9                      | 9                 | 9                 |            |          |          |                | 9.7                        |
| StClair05       | 3/3/16           | 32.329           | 151.628           | 3.0               | 1.6         | 0.4                   | 16.5                | 3.25                | <5                 | 81.95                             | 0.0120         | 0.0145         | 0.0084         | 9                      | 10                | 10                | 0.0027     | 0.0050   | 0.0030   | 3.0            |                            |
| StClair06       | 3/3/16           | 32.326           | 151.288           | 2.3               | 1.5         | 0.4                   | 13.7                | 4                   | <5                 | 83.90                             | 0.0152         | 0.0185         | 0.0107         | 8                      | 9                 | 9                 | 0.0027     | 0.0050   | 0.0027   | 2.7            |                            |
| StClair07       | 3/3/16           | 32.326           | 151.280           | 3.9               | 1.8         | 0.4                   | 17.5                | 4                   | <5                 | 84.43                             | 0.0061         | 0.0075         | 0.0042         | 9                      | 10                | 10                | 0.0023     | 0.0047   | 0.0027   | 2.7            |                            |
| Wivenhoe01      | 8/3/16           | 27.346           | 152.542           | 8.6               | 2.7         | 0.5                   | 18.5                | 2.23                | 35                 | 69.46                             | 0.0109         | 0.0127         | 0.0056         | 13                     | 12                | 12                | 0.0023     | 0.0033   | 0.0013   | 1.0            |                            |
| Wivenhoe02      | 8/3/16           | 27.346           | 152.543           | 13.0              | 3.8         | 0.7                   | 10.5                | 2                   | 40                 | 65.30                             | 0.0059         | 0.0067         | 0.0030         | 10                     | 10                | 10                | 0.004333   | 0.005333 | 0.003333 | 2.7            |                            |

## Spectra at a turbid station

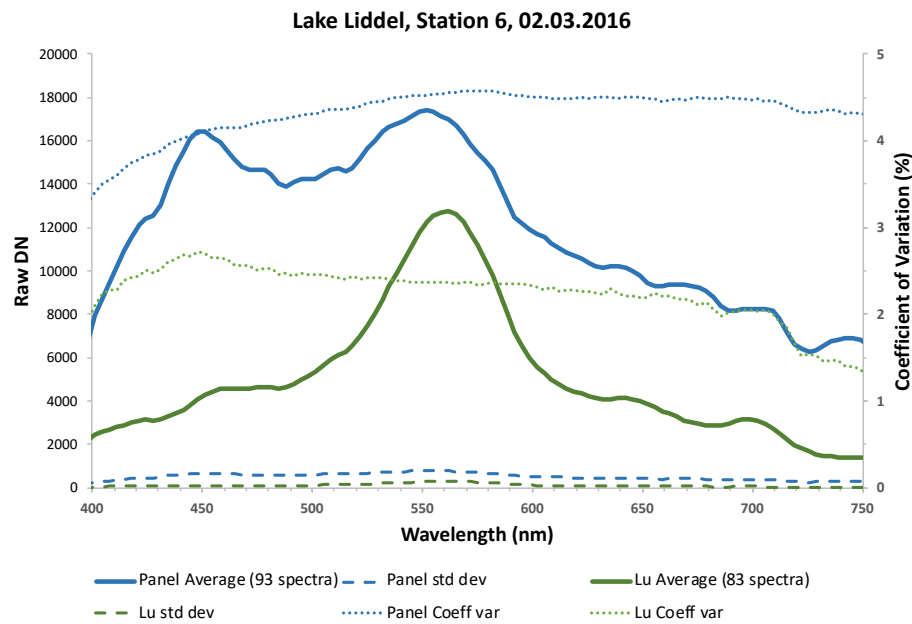

**Figure S1.** Mean raw spectra for panel (blue) and water surface (green, tip of the spectroradiometer just below the water surface) measurements made at Station 6 on Lake Liddel, 02.03.2016, presented together with standard deviation (dashed lines, same DN scale) and coefficient of variation (dotted lines, secondary axis). The measurements were made under ‘wavy’ conditions with our field notes indicating waves of 10-15 cm (as large as any waves were during our measurement campaign) and Secchi disk depth was 1.25 m. These comprise of 93 and 83 individual scans, respectively. For both sets of measurements the standard deviation is very low and there is greater variation about the panel measurements than for those made underwater. The coefficient of variation is ~4.2% for the panel measurements and ~2% for the water surface measurements.

## HydroLight modelling

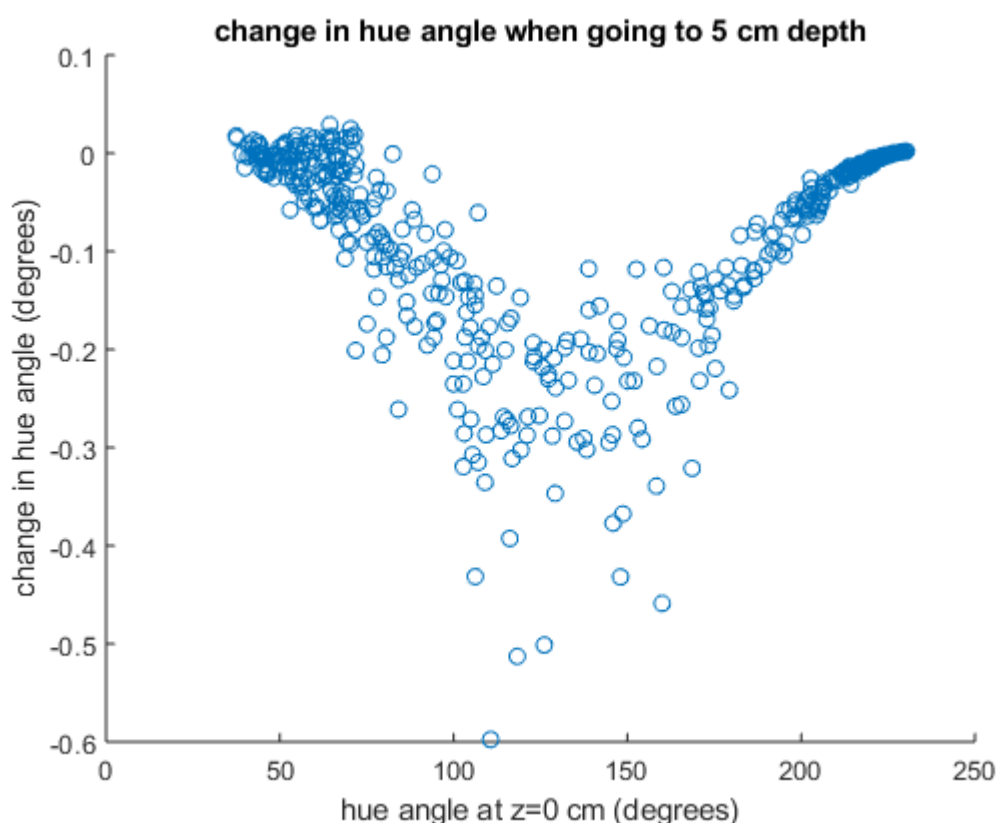

**Figure S2.** Model outcomes as reported in IOCCG report number 5 (IOCCG, 2006) to show changes in hue angle when a spectrometer is lowered to 5 cm depth in natural waters. The data is the result of Hydrolight modelling used to model reflectance based on the IOP and AOP of 500 natural waters covering a broad range in composition (CHL, NAP, CDOM), representing the full range of clearest ocean waters to turbid coastal and inland waters. The model parameters are reported for 500 different IOPs at a wavelength spacing of 10 nm over 400 and 800 nm. The results cover two parameters for remote sensing reflectance;  $R_{rs}$  (just above water) and  $rrs$  (just below the water surface). We estimated the impact of depth ( $z$ ) as follows: first the upwelling radiance just below the surface was calculated from  $rrs$  and assuming a white irradiance spectrum (note that the whole procedure is not dependent upon the absolute value of this white illumination spectrum). Subsequently, the upwelling radiance was calculated at a depth of 5 cm or 0.05 m, a typical value for the Atlantic. This was done by calculating for each wavelength and each spectrum the attenuation by 5 cm of water as:  $\exp(-K_d(0) \cdot 5/100)$ . This upwelling radiance at 5 cm depth was subsequently divided by the irradiance spectrum near the surface, similar to what we have undertaken in our study. All spectra were then converted to the hue angle as described in the literature given above.

This figure shows that the broad range of coloured waters that were observed in Australia are covered by this dataset from IOCCG. An angle of 40 degrees belongs to the most brown waters and an angle of 230 degrees belongs to the bluest, most oligotrophic oceans.

The results confirm our confidence in the measurements undertaken. Holding the spectrometer at depth, albeit shallow, does give a different hue angle of the measurement. However, because all spectra are folded with the broad chromaticity curves and the relative contribution is taken, these changes are extremely small.

## Reference

IOCCG. *Remote Sensing of Inherent Optical Properties: Fundamentals, Tests of Algorithms, and Applications*; Reports of the International Ocean-Colour Coordinating Group, No. 5; Lee, Z.-P., Ed.; IOCCG: Dartmouth, NS, Canada, 2006.
